# Supplementary material
Source: publisher figshare collection journal article supplement (https://sage.figshare.com/ndownloader/files/14230382)
Supplement: Supplementary file 1 [file 14230382]

## Appendix A1: Proportion of Culture of Health Internal (COH-INT) “Yes”

### Responses

|                                                                                                                                                                                                          | 2013 | 2015 |
|----------------------------------------------------------------------------------------------------------------------------------------------------------------------------------------------------------|------|------|
| <b>During the 12-month period, did your organization:</b>                                                                                                                                                |      |      |
| Conduct employee health risk appraisals (HRAs) or health assessments (HAs) and provide individual feedback plus health education resources for follow-up action?                                         |      |      |
| Almost all employees, %                                                                                                                                                                                  | 47%  | 65%  |
| Most employees, %                                                                                                                                                                                        | 18%  | 6%   |
| Some employees, %                                                                                                                                                                                        | 18%  | 29%  |
| Few employees, %                                                                                                                                                                                         | 6%   | 0%   |
| No employees, %                                                                                                                                                                                          | 12%  | 0%   |
| Provide free or subsidized biometric screening for common health conditions and risk factors (beyond self-report) followed by directed feedback and clinical referral when appropriate?                  |      |      |
| Almost all employees, %                                                                                                                                                                                  | 47%  | 47%  |
| Most employees, %                                                                                                                                                                                        | 29%  | 24%  |
| Some employees, %                                                                                                                                                                                        | 6%   | 6%   |
| Few employees, %                                                                                                                                                                                         | 6%   | 6%   |
| No employees, %                                                                                                                                                                                          | 12%  | 18%  |
| Provide employees with health education materials related to common health conditions and risk factors?                                                                                                  |      |      |
| Almost all employees, %                                                                                                                                                                                  | 71%  | 76%  |
| Most employees, %                                                                                                                                                                                        | 24%  | 18%  |
| Some employees, %                                                                                                                                                                                        | 0%   | 0%   |
| Few employees, %                                                                                                                                                                                         | 0%   | 0%   |
| No employees, %                                                                                                                                                                                          | 6%   | 6%   |
| Provide interactive educational programming on preventing and controlling common health conditions and risk factors?                                                                                     |      |      |
| Almost all employees, %                                                                                                                                                                                  | 47%  | 53%  |
| Most employees, %                                                                                                                                                                                        | 24%  | 18%  |
| Some employees, %                                                                                                                                                                                        | 18%  | 18%  |
| Few employees, %                                                                                                                                                                                         | 6%   | 6%   |
| No employees, %                                                                                                                                                                                          | 6%   | 6%   |
| Provide and promote free or subsidized lifestyle coaching/counseling or self-management programs that equip employees with skills and motivation to set and meet their personal health management goals? |      |      |
| Almost all employees, %                                                                                                                                                                                  | 59%  | 71%  |
| Most employees, %                                                                                                                                                                                        | 18%  | 12%  |
| Some employees, %                                                                                                                                                                                        | 12%  | 18%  |
| Few employees, %                                                                                                                                                                                         | 12%  | 0%   |
| No employees, %                                                                                                                                                                                          | 0%   | 0%   |

|                                                                                                                                                                         |     |     |
|-------------------------------------------------------------------------------------------------------------------------------------------------------------------------|-----|-----|
| Use and combine financial incentives with other strategies to increase participation in health promotion programs?                                                      |     |     |
| Almost all employees, %                                                                                                                                                 | 53% | 53% |
| Most employees, %                                                                                                                                                       | 12% | 18% |
| Some employees, %                                                                                                                                                       | 12% | 12% |
| Few employees, %                                                                                                                                                        | 6%  | 6%  |
| No employees, %                                                                                                                                                         | 18% | 12% |
| Use individual or team competitions or challenges in combination with additional interventions to support employees making behavior changes?                            |     |     |
| Almost all employees, %                                                                                                                                                 | 35% | 41% |
| Most employees, %                                                                                                                                                       | 18% | 18% |
| Some employees, %                                                                                                                                                       | 12% | 18% |
| Few employees, %                                                                                                                                                        | 18% | 12% |
| No employees, %                                                                                                                                                         | 18% | 12% |
| Provide an employee assistance program (EAP)?                                                                                                                           |     |     |
| Almost all employees, %                                                                                                                                                 | 94% | 94% |
| Most employees, %                                                                                                                                                       | 0%  | 0%  |
| Some employees, %                                                                                                                                                       | 6%  | 6%  |
| Few employees, %                                                                                                                                                        | 0%  | 0%  |
| No employees, %                                                                                                                                                         | 0%  | 0%  |
| Provide and support flexible work scheduling policies?                                                                                                                  |     |     |
| Almost all employees, %                                                                                                                                                 | 18% | 24% |
| Most employees, %                                                                                                                                                       | 6%  | 6%  |
| Some employees, %                                                                                                                                                       | 47% | 47% |
| Few employees, %                                                                                                                                                        | 24% | 18% |
| No employees, %                                                                                                                                                         | 6%  | 6%  |
| Provide and promote free or subsidized lifestyle coaching/counseling or self-management programs that equip employees with skills and motivation to quit using tobacco? |     |     |
| Almost all employees, %                                                                                                                                                 | 76% | 76% |
| Most employees, %                                                                                                                                                       | 6%  | 6%  |
| Some employees, %                                                                                                                                                       | 0%  | 0%  |
| Few employees, %                                                                                                                                                        | 12% | 12% |
| No employees, %                                                                                                                                                         | 6%  | 6%  |
| Provide or subsidize exercise facilities or other environmental supports for physical activity?                                                                         |     |     |
| Almost all employees, %                                                                                                                                                 | 24% | 24% |
| Most employees, %                                                                                                                                                       | 18% | 24% |
| Some employees, %                                                                                                                                                       | 35% | 29% |
| Few employees, %                                                                                                                                                        | 12% | 24% |
| No employees, %                                                                                                                                                         | 12% | 0%  |
| Provide a physical work environment design that promotes health?                                                                                                        |     |     |
| Almost all employees, %                                                                                                                                                 | 12% | 12% |
| Most employees, %                                                                                                                                                       | 18% | 24% |
| Some employees, %                                                                                                                                                       | 53% | 47% |

|                                                                                                                                 |     |     |
|---------------------------------------------------------------------------------------------------------------------------------|-----|-----|
| Few employees, %                                                                                                                | 18% | 18% |
| No employees, %                                                                                                                 | 0%  | 0%  |
| Provide and promote organized physical activity programs for employees (other than the use of an exercise facility)?            |     |     |
| Almost all employees, %                                                                                                         | 31% | 38% |
| Most employees, %                                                                                                               | 13% | 6%  |
| Some employees, %                                                                                                               | 19% | 19% |
| Few employees, %                                                                                                                | 31% | 38% |
| No employees, %                                                                                                                 | 6%  | 0%  |
| Encourage active transportation to and from work?                                                                               |     |     |
| Almost all employees, %                                                                                                         | 6%  | 6%  |
| Most employees, %                                                                                                               | 12% | 12% |
| Some employees, %                                                                                                               | 24% | 24% |
| Few employees, %                                                                                                                | 47% | 47% |
| No employees, %                                                                                                                 | 12% | 12% |
| Steer employees toward healthy food choices?                                                                                    |     |     |
| Almost all employees, %                                                                                                         | 24% | 24% |
| Most employees, %                                                                                                               | 12% | 35% |
| Some employees, %                                                                                                               | 29% | 24% |
| Few employees, %                                                                                                                | 35% | 18% |
| No employees, %                                                                                                                 | 0%  | 0%  |
| Promote and market health promotion programs to employees?                                                                      |     |     |
| Almost all employees, %                                                                                                         | 59% | 71% |
| Most employees, %                                                                                                               | 12% | 18% |
| Some employees, %                                                                                                               | 24% | 12% |
| Few employees, %                                                                                                                | 6%  | 0%  |
| No employees, %                                                                                                                 | 0%  | 0%  |
| Provide training for managers that improves their ability to recognize and reduce workplace stress-related issues?              |     |     |
| Completely, %                                                                                                                   | 6%  | 18% |
| Mostly, %                                                                                                                       | 18% | 24% |
| Somewhat, %                                                                                                                     | 53% | 35% |
| Not at all, %                                                                                                                   | 24% | 24% |
| Tailor health promotion programs and materials to the preferences and needs of its employees?                                   |     |     |
| Completely, %                                                                                                                   | 6%  | 12% |
| Mostly, %                                                                                                                       | 41% | 35% |
| Somewhat, %                                                                                                                     | 24% | 35% |
| Not at all, %                                                                                                                   | 29% | 18% |
| Provide opportunities for employee participation in organizational decisions regarding workplace issues that affect job stress? |     |     |
| Completely, %                                                                                                                   | 0%  | 0%  |
| Mostly, %                                                                                                                       | 6%  | 18% |
| Somewhat, %                                                                                                                     | 71% | 59% |

|                                                                                                                                        |     |     |
|----------------------------------------------------------------------------------------------------------------------------------------|-----|-----|
| Not at all, %                                                                                                                          | 24% | 24% |
| Demonstrate organizational commitment and support of worksite health promotion at all levels of management?                            |     |     |
| Completely, %                                                                                                                          | 18% | 24% |
| Mostly, %                                                                                                                              | 29% | 53% |
| Somewhat, %                                                                                                                            | 35% | 6%  |
| Not at all, %                                                                                                                          | 18% | 18% |
| Did your organization have a strategic plan that included measurable organizational objectives for the health promotion program? % Yes | 65% | 88% |
| Did your organization have dedicated funding and staffing (either part-time or full-time) for health promotion programs? % Yes         | 94% | 94% |

**SOURCE** Authors' analysis of data from the Culture of Health Internal survey.

## Appendix A2: Proportion of Culture of Health External (COH-EXT) “Yes” Responses

|                                                                                                                                                                                                                                             | 2013 | 2015 |
|---------------------------------------------------------------------------------------------------------------------------------------------------------------------------------------------------------------------------------------------|------|------|
| Did your organization have dedicated funding and staffing (either part-time or full-time) for community engagement efforts directed at improving the health and well-being of communities?                                                  | 71%  | 71%  |
| Did your organization have a strategic plan that included specific and measurable goals for improving the health and well-being of communities?                                                                                             | 29%  | 36%  |
| Did your organization seek input from community leaders/representatives regarding community needs and interests to inform your organization’s plans for community engagement efforts directed at improving community health and well-being? | 79%  | 79%  |
| Did your organization identify and track key performance indicators (KPIs) to measure and evaluate its community engagement efforts and outcomes over time?                                                                                 | 29%  | 43%  |
| Did your organization offer an employee matching-gift program?                                                                                                                                                                              | 93%  | 93%  |
| How does your organization support employee volunteerism?                                                                                                                                                                                   |      |      |
| Coordination of volunteer opportunities                                                                                                                                                                                                     | 100% | 86%  |
| Employee-volunteer recognition awards                                                                                                                                                                                                       | 43%  | 36%  |
| “On-company-time”/ Paid release time policy                                                                                                                                                                                                 | 57%  | 64%  |
| Grants to nonprofits where employees volunteer regularly                                                                                                                                                                                    | 79%  | 79%  |
| Organization-wide day(s) of service                                                                                                                                                                                                         | 64%  | 71%  |
| Volunteer sabbatical                                                                                                                                                                                                                        | 14%  | 14%  |
| Other                                                                                                                                                                                                                                       | 14%  | 14%  |
| Did your organization provide charitable giving in the form of goods or pro bono services?                                                                                                                                                  | 86%  | 86%  |
| Did your organization participate in any community coalitions focused on health?                                                                                                                                                            | 71%  | 71%  |
| Did your organization participate in any community coalitions focused on other issues that may impact health (e.g., built environment, poverty, housing, homelessness, education, access to healthy food)?                                  | 79%  | 79%  |
| Did your organization take a leadership position on any specific social cause by promoting public awareness or behavior change (e.g., via public service announcements)?                                                                    | 29%  | 29%  |
| Did your organization engage employees’ families and the broader community in company-sponsored health events (e.g., health fairs, farmers’ market, fun runs, and fitness classes)?                                                         | 57%  | 57%  |
| Please indicate all the areas of community health that your organization addressed through public leadership roles, charitable giving, employee volunteerism, and other in-kind contributions.                                              |      |      |
| ECONOMIC DIMENSION (e.g., poverty, economic development, economic segregation, cost of living, redistribution, fiscal capacity, exploitation)                                                                                               | 64%  | 64%  |
| EMPLOYMENT DIMENSION (e.g., workforce development, job security, training/retraining, area business capacity)                                                                                                                               | 64%  | 64%  |

|                                                                                                                                                                                                                                                                                                       |     |     |
|-------------------------------------------------------------------------------------------------------------------------------------------------------------------------------------------------------------------------------------------------------------------------------------------------------|-----|-----|
| EDUCATION DIMENSION (e.g., graduation rates, rates of progression to post-secondary education, school funding, student/teacher ratios, curriculum quality, after-school care and extra-curricular programming, preschool/kindergarten/early intervention, access to libraries, scholarships)          | 86% | 86% |
| ENVIRONMENTAL DIMENSION (e.g., outdoor air quality, indoor air quality, water quality, noise, sidewalk availability, street lights, public recreational space)                                                                                                                                        | 86% | 86% |
| HOUSING DIMENSION (e.g., housing availability/quality, homelessness, abandoned housing, low income housing)                                                                                                                                                                                           | 57% | 57% |
| MEDICAL DIMENSION (e.g., access to care, number of providers, provider quality, indigent care, insurance coverage)                                                                                                                                                                                    | 43% | 50% |
| PUBLIC HEALTH DIMENSION (e.g., programs for awareness-building outreach, screening, community based clinics/education, immunization)                                                                                                                                                                  | 64% | 64% |
| BEHAVIORAL DIMENSION (e.g., tobacco use, cessation programs, public space smoking restrictions, cost/accessibility of cigarettes, physical activity levels, physical education requirements in schools, public and private recreational facilities, food quality/availability/cost, school nutrition) | 64% | 71% |
| TRANSPORT AND BUILT ENVIRONMENT DIMENSION (e.g., infrastructure, pedestrian/bike safety, public transportation)                                                                                                                                                                                       | 43% | 43% |

**SOURCE** Authors' analysis of data from the Culture of Health External survey.

## **Appendix A3: Subject Matter Experts Interviewed for the Study**

Paul E. Terry, PhD - Health Enhancement Research Organization (HERO)

K. Andrew Crighton, MD - Prudential Financial Inc.

George J. Isham, MD, MS - HealthPartners

Anita Chandra, DrPH, PH - RAND Corporation

Kim Fortunato, JD - Campbell Soup Company

Charlie Kim - Next Jump

Jeff Lundy, PhD - PepsiCo

Neil Goldfarb - Greater Philadelphia Business Coalition on Health

Peter Wald, MD, MPH - USAA

Cathy Baase, MD - The Dow Chemical Company
